# Supplementary material for: Secretome profiling of PC3/nKR cells, a novel highly migrating prostate cancer subline derived from PC3 cells
Source: PubMed Central journal article supplement (PMC6690527; doi:10.1371/journal.pone.0220807), 2019-08-12
Supplement: pone.0220807.s001.pdf [file pone.0220807.s001.pdf]

**Supplementary Table 2: List of all identified protein and peptides in PC-3/nkR and PC-3 cells**

| Protein ID | Protein names                                                            | Gene name | Spectra Count | Unique peptides | Sequence coverage [%] | Detected peptide | 128(PC-3nKR) /127(PC-3) | Secreted protein from Only our DB |
|------------|--------------------------------------------------------------------------|-----------|---------------|-----------------|-----------------------|------------------|-------------------------|-----------------------------------|
| Q1L6U9     | Prostate-associated microseminoprotein                                   | MSMP      | 21            | 3               | 43.2                  |                  | 0.076                   | +                                 |
| P05121     | Plasminogen activator inhibitor 1                                        | SERPINE1  | 34            | 7               | 22.6                  |                  | 0.217                   |                                   |
| E5RHV6     | CMP-N-acetylneuraminase-beta-galactosamide-alpha-2,3-sialyltransferase 1 | ST3GAL1   | 3             | 2               | 29.9                  |                  | 0.226                   |                                   |
| Q5T0D2     | UMP-CMP kinase                                                           | CMPK1     | 2             | 2               | 7.7                   | Only 2nd batch   | 0.232                   |                                   |
| P48444     | Coatmer subunit delta                                                    | ARCN1     | 2             | 2               | 4.5                   | Only 2nd batch   | 0.233                   |                                   |
| Q06323     | Proteasome activator complex subunit 1                                   | PSME1     | 3             | 3               | 15.7                  |                  | 0.266                   |                                   |
| Q9HC84     | Mucin-5B                                                                 | MUC5B     | 7             | 6               | 1.3                   |                  | 0.273                   |                                   |
| Q16555     | Dihydropyrimidinase-related protein 2                                    | DPYSL2    | 3             | 3               | 7                     |                  | 0.295                   |                                   |
| O15230     | Laminin subunit alpha-5                                                  | LAMA5     | 21            | 16              | 6                     |                  | 0.305                   |                                   |
| Q9BZM5     | NKG2D ligand 2                                                           | ULBP2     | 7             | 3               | 12.2                  |                  | 0.319                   | +                                 |
| F8W1K5     | Protein canopy homolog 2                                                 | CNPY2     | 3             | 2               | 25.5                  | Only 2nd batch   | 0.335                   |                                   |
| P09529     | Inhibin beta B chain                                                     | INHBB     | 3             | 2               | 5.4                   |                  | 0.362                   |                                   |
| Q9H3G5     | Probable serine carboxypeptidase CPVL                                    | CPVL      | 10            | 3               | 7.8                   |                  | 0.363                   |                                   |
| F8WAE5     | Eukaryotic translation initiation factor 2A                              | EIF2A     | 2             | 2               | 5.9                   | Only 2nd batch   | 0.368                   |                                   |
| J3QRX2     | Granulocyte colony-stimulating factor                                    | CSF3      | 12            | 2               | 7.7                   |                  | 0.370                   |                                   |
| Q9UBS4     | DnaJ homolog subfamily B member 11                                       | DNAJB11   | 2             | 2               | 6.7                   |                  | 0.372                   |                                   |
| P28072     | Proteasome subunit beta type-6                                           | PSMB6     | 3             | 2               | 7.9                   |                  | 0.375                   |                                   |
| H0YM70     | Proteasome activator complex subunit 2                                   | PSME2     | 4             | 2               | 8.8                   |                  | 0.393                   | +                                 |
| Q13753     | Laminin subunit gamma-2                                                  | LAMC2     | 2             | 2               | 2.6                   |                  | 0.395                   |                                   |
| Q32MZ4     | Leucine-rich repeat flightless-interacting protein 1                     | LRRFIP1   | 3             | 2               | 3.3                   | Only 2nd batch   | 0.403                   |                                   |
| P13667     | Protein disulfide-isomerase A4                                           | PDIA4     | 31            | 12              | 22.6                  |                  | 0.411                   |                                   |
| P27348     | 14-3-3 protein theta                                                     | YWHAQ     | 4             | 2               | 12.7                  |                  | 0.413                   |                                   |
| P62805     | Histone H4                                                               | HIST1H4A  | 4             | 2               | 19.4                  |                  | 0.417                   | +                                 |
| Q5T123     | SH3 domain-binding glutamic acid-rich-like protein 3                     | SH3BGL3   | 4             | 2               | 20.5                  |                  | 0.424                   |                                   |
| Q13630     | GDP-L-fucose synthase                                                    | TSTA3     | 4             | 2               | 9                     |                  | 0.435                   | +                                 |
| P04155     | Trefoil factor 1                                                         | TFF1      | 21            | 3               | 54.8                  |                  | 0.445                   |                                   |
| P62937     | Peptidyl-prolyl cis-trans isomerase A                                    | PPIA      | 21            | 7               | 40                    |                  | 0.451                   |                                   |
| P49006     | MARCKS-related protein                                                   | MARCKSL1  | 5             | 3               | 33.8                  |                  | 0.452                   | +                                 |
| P13693     | Translationally-controlled tumor protein                                 | TPT1      | 15            | 3               | 19.8                  |                  | 0.454                   |                                   |
| P15018     | Leukemia inhibitory factor                                               | LIF       | 16            | 2               | 16.8                  |                  | 0.454                   |                                   |
| P12956     | X-ray repair cross-complementing protein 6                               | XRCC6     | 5             | 5               | 11.7                  |                  | 0.459                   |                                   |
| P12109     | Collagen alpha-1(VI) chain                                               | COL6A1    | 129           | 26              | 33.8                  |                  | 0.461                   |                                   |
| P02545     | Prelamin-A/C                                                             | LMNA      | 26            | 13              | 24.5                  |                  | 0.467                   |                                   |
| Q08380     | Galectin-3-binding protein                                               | LGALS3BP  | 12            | 8               | 19                    |                  | 0.467                   |                                   |
| H0Y704     | Zinc finger protein 185                                                  | ZNF185    | 2             | 2               | 7.4                   | Only 2nd batch   | 0.467                   |                                   |
| Q8IWU5     | Extracellular sulfatase Sulf-2                                           | SULF2     | 7             | 5               | 6.1                   |                  | 0.467                   |                                   |
| Q71UI9     | Histone H2A.V                                                            | H2AFV     | 4             | 2               | 16.4                  |                  | 0.468                   | +                                 |
| Q9NTK5     | Obg-like ATPase 1                                                        | OLA1      | 3             | 2               | 6.8                   |                  | 0.478                   |                                   |
| A0A0A0MSM0 | Heat shock protein 105 kDa                                               | HSPH1     | 4             | 3               | 5                     |                  | 0.495                   | +                                 |
| P01036     | Cystatin-S                                                               | CST4      | 4             | 2               | 17.7                  |                  | 0.495                   |                                   |
| Q5JWQ6     | Neuropilin-1                                                             | NRP1      | 18            | 6               | 10.9                  |                  | 0.508                   |                                   |
| P37802     | Transgelin-2                                                             | TAGLN2    | 24            | 8               | 38.7                  |                  | 0.517                   |                                   |
| P19875     | C-X-C motif chemokine 2                                                  | CXCL2     | 7             | 2               | 22.4                  |                  | 0.518                   |                                   |
| A0A087X1W2 | Protein arginine N-methyltransferase 1                                   | PRMT1     | 6             | 4               | 18.6                  |                  | 0.518                   |                                   |
| A0A0A0MRN5 | Opioid growth factor receptor                                            | OGFR      | 2             | 2               | 5.4                   | Only 2nd batch   | 0.521                   | +                                 |

|            |                                                                         |           |    |    |      |                |       |   |
|------------|-------------------------------------------------------------------------|-----------|----|----|------|----------------|-------|---|
| A0A087WZK9 | Eukaryotic translation initiation factor 3 subunit H                    | EIF3H     | 3  | 2  | 9.2  | Only 2nd batch | 0.524 | + |
| P23588     | Eukaryotic translation initiation factor 4B                             | EIF4B     | 2  | 2  | 4.3  |                | 0.526 | + |
| Q16658     | Fascin                                                                  | FSCN1     | 17 | 9  | 19.3 |                | 0.527 |   |
| E9PEX6     | Dihydrolipoyl dehydrogenase, mitochondrial                              | DLD       | 6  | 2  | 4.9  |                | 0.536 |   |
| P61981     | 14-3-3 protein gamma                                                    | YWHAG     | 7  | 5  | 25.5 |                | 0.547 |   |
| O43291     | Kunitz-type protease inhibitor 2                                        | SPINT2    | 6  | 2  | 10.7 |                | 0.550 |   |
| A6XND1     | Insulin-like growth factor-binding protein 3                            | IGFBP3    | 15 | 7  | 32.3 |                | 0.552 |   |
| Q99985     | Semaphorin-3C                                                           | SEMA3C    | 4  | 4  | 5.6  |                | 0.553 |   |
| M0QYT0     | Heterogeneous nuclear ribonucleoprotein L                               | HNRNPL    | 5  | 3  | 11.8 |                | 0.557 | + |
| Q32P28     | Prolyl 3-hydroxylase 1                                                  | LEPRE1    | 4  | 3  | 5    |                | 0.561 |   |
| Q9P2E9     | Ribosome-binding protein 1                                              | RRBP1     | 21 | 11 | 21.5 |                | 0.577 |   |
| H0YN18     | Proteasome subunit alpha type-4                                         | PSMA4     | 7  | 5  | 19.1 |                | 0.580 |   |
| P55268     | Laminin subunit beta-2                                                  | LAMB2     | 7  | 6  | 3.6  |                | 0.580 |   |
| P04083     | Annexin A1                                                              | ANXA1     | 3  | 3  | 8.7  | Only 2nd batch | 0.581 |   |
| O60271     | C-Jun-amino-terminal kinase-interacting protein 4                       | SPAG9     | 2  | 2  | 2.6  | Only 2nd batch | 0.581 |   |
| P62826     | GTP-binding nuclear protein Ran                                         | RAN       | 7  | 4  | 18.5 |                | 0.583 |   |
| F8WCZ6     | Complement C1s subcomponent                                             | C1S       | 3  | 2  | 5.4  |                | 0.587 |   |
| Q9Y490     | Talin-1                                                                 | TLN1      | 6  | 6  | 2.8  |                | 0.591 |   |
| Q09328     | Alpha-1,6-mannosylglycoprotein 6-beta-N-acetylglucosaminyltransferase A | MGAT5     | 6  | 4  | 4.6  |                | 0.595 | + |
| E9PP21     | Cysteine and glycine-rich protein 1                                     | CSRP1     | 7  | 3  | 33.8 |                | 0.599 |   |
| P02751     | Fibronectin                                                             | FN1       | 27 | 16 | 9.8  |                | 0.603 |   |
| I3L3Q4     | Glyoxalase domain-containing protein 4                                  | GLOD4     | 10 | 5  | 22   |                | 0.612 | + |
| P37837     | Transaldolase                                                           | TALDO1    | 9  | 4  | 12.8 |                | 0.614 |   |
| P12814     | Alpha-actinin-1                                                         | ACTN1     | 52 | 13 | 16.7 |                | 0.617 |   |
| O00299     | Chloride intracellular channel protein 1                                | CLIC1     | 6  | 3  | 13.7 |                | 0.621 |   |
| A0A0B4J1Y5 | Epidermal growth factor receptor                                        | EGFR      | 2  | 2  | 4.1  |                | 0.623 | + |
| E9PQ63     | Carbonyl reductase [NADPH] 1                                            | CBR1      | 6  | 2  | 16.9 |                | 0.628 |   |
| P08133     | Annexin A6                                                              | ANXA6     | 4  | 2  | 4.3  |                | 0.630 |   |
| P00736     | Complement C1r subcomponent                                             | C1R       | 8  | 5  | 8.1  |                | 0.631 |   |
| Q9Y617     | Phosphoserine aminotransferase                                          | PSAT1     | 10 | 7  | 19.7 |                | 0.635 |   |
| Q99880     | Histone H2B type 1-L                                                    | HIST1H2BL | 7  | 3  | 22.2 |                | 0.642 |   |
| Q9HAT2     | Sialate O-acetyltransferase                                             | SIAE      | 2  | 2  | 5    | Only 2nd batch | 0.649 |   |
| F8VPF3     | Myosin light polypeptide 6                                              | MYL6      | 3  | 2  | 20   |                | 0.651 |   |
| E7EUT5     | Glyceraldehyde-3-phosphate dehydrogenase                                | GAPDH     | 52 | 7  | 36.9 |                | 0.654 |   |
| P13797     | Plastin-3                                                               | PLS3      | 17 | 9  | 14.1 |                | 0.656 |   |
| E7EV71     | Latent-transforming growth factor beta-binding protein 1                | LTBP1     | 52 | 19 | 17.6 |                | 0.661 |   |
| H3BTN5     | Pyruvate kinase                                                         | PKM       | 33 | 11 | 24.3 |                | 0.665 |   |
| P60174     | Triosephosphate isomerase                                               | TPI1      | 54 | 10 | 47.2 |                | 0.667 |   |
| P56537     | Eukaryotic translation initiation factor 6                              | EIF6      | 4  | 2  | 11.4 |                | 0.668 |   |
| Q9UBR2     | Cathepsin Z                                                             | CTSZ      | 28 | 8  | 27.7 |                | 0.672 |   |
| P49721     | Proteasome subunit beta type-2                                          | PSMB2     | 4  | 2  | 7.5  |                | 0.675 |   |
| Q9Y3F4     | Serine-threonine kinase receptor-associated protein                     | STRAP     | 4  | 2  | 6.3  |                | 0.675 |   |
| P45974     | Ubiquitin carboxyl-terminal hydrolase 5                                 | USP5      | 3  | 2  | 2.9  |                | 0.676 |   |
| P00558     | Phosphoglycerate kinase 1                                               | PGK1      | 49 | 16 | 50.6 |                | 0.676 |   |
| Q9NZ08     | Endoplasmic reticulum aminopeptidase 1                                  | ERAP1     | 15 | 4  | 4.6  |                | 0.685 |   |
| C9JYY6     | Neuronal cell adhesion molecule                                         | NRCAM     | 2  | 2  | 1.7  | Only 2nd batch | 0.686 |   |
| Q9GZX9     | Twisted gastrulation protein homolog 1                                  | TWSG1     | 3  | 2  | 11.2 |                | 0.687 |   |
| M0QZK8     | Gamma-glutamylcyclotransferase                                          | GGCT      | 5  | 2  | 22.3 |                | 0.694 | + |
| F5H7V9     | Tenascin                                                                | TNC       | 5  | 3  | 2.4  |                | 0.697 |   |
| Q14974     | Importin subunit beta-1                                                 | KPNB1     | 8  | 5  | 7.6  |                | 0.700 |   |

|            |                                                                   |          |    |    |      |                |       |   |
|------------|-------------------------------------------------------------------|----------|----|----|------|----------------|-------|---|
| Q08431     | Lactadherin                                                       | MFGE8    | 12 | 6  | 18.9 |                | 0.701 |   |
| P07108     | Acyl-CoA-binding protein                                          | DBI      | 9  | 2  | 41.4 |                | 0.704 |   |
| A0A0C4DFV9 | Protein SET                                                       | SET      | 7  | 5  | 16.9 |                | 0.709 |   |
| P31153     | S-adenosylmethionine synthase isoform type-2                      | MAT2A    | 4  | 2  | 7.6  |                | 0.712 |   |
| P40925     | Malate dehydrogenase, cytoplasmic                                 | MDH1     | 17 | 8  | 29.9 |                | 0.716 |   |
| Q01459     | Di-N-acetylchitobiase                                             | CTBS     | 3  | 2  | 7.8  |                | 0.717 |   |
| Q15582     | Transforming growth factor-beta-induced protein ig-h3             | TGFBI    | 14 | 8  | 15.1 |                | 0.719 |   |
| E9PKE3     | Heat shock cognate 71 kDa protein                                 | HSPA8    | 51 | 12 | 21.7 |                | 0.721 |   |
| P06733     | Alpha-enolase                                                     | ENO1     | 69 | 15 | 37.3 |                | 0.721 |   |
| P28070     | Proteasome subunit beta type-4                                    | PSMB4    | 10 | 4  | 15.9 |                | 0.724 |   |
| O00410     | Importin-5                                                        | IPO5     | 8  | 4  | 4    |                | 0.725 |   |
| Q9BQT9     | Calsyntenin-3                                                     | CLSTN3   | 6  | 4  | 4.6  |                | 0.728 |   |
| E7ENU9     | Macrophage-capping protein                                        | CAPG     | 5  | 3  | 13   |                | 0.731 |   |
| Q9Y4K0     | Lysyl oxidase homolog 2                                           | LOXL2    | 23 | 12 | 18.6 |                | 0.735 |   |
| P12004     | Proliferating cell nuclear antigen                                | PCNA     | 10 | 2  | 13   |                | 0.735 |   |
| H0Y8G5     | Heterogeneous nuclear ribonucleoprotein D0                        | HNRNPD   | 5  | 5  | 19.6 |                | 0.737 |   |
| P10619     | Lysosomal protective protein                                      | CTSA     | 26 | 5  | 11.7 |                | 0.738 |   |
| P12110     | Collagen alpha-2(VI) chain                                        | COL6A2   | 23 | 9  | 8.7  |                | 0.741 |   |
| Q12792     | Twinfilin-1                                                       | TWF1     | 3  | 2  | 7.4  |                | 0.742 | + |
| J3KTB5     | Eukaryotic initiation factor 4A-I                                 | EIF4A1   | 12 | 6  | 28.4 |                | 0.743 |   |
| P01034     | Cystatin-C                                                        | CST3     | 32 | 5  | 30.1 |                | 0.745 |   |
| C9J4N6     | Isocitrate dehydrogenase [NADP] cytoplasmic                       | IDH1     | 3  | 2  | 12.7 |                | 0.746 |   |
| Q14520     | Hyaluronan-binding protein 2                                      | HABP2    | 3  | 2  | 4.1  |                | 0.747 |   |
| Q02809     | Procollagen-lysine,2-oxoglutarate 5-dioxygenase 1                 | PLOD1    | 6  | 6  | 7.3  |                | 0.750 |   |
| Q969E4     | Transcription elongation factor A protein-like 3                  | TCEAL3   | 3  | 2  | 12.5 |                | 0.752 | + |
| Q9UM22     | Mammalian ependymin-related protein 1                             | EPDR1    | 5  | 3  | 14.7 |                | 0.752 |   |
| O75509     | Tumor necrosis factor receptor superfamily member 21              | TNFRSF21 | 3  | 2  | 3.4  |                | 0.756 |   |
| Q9H1E3     | Nuclear ubiquitous casein and cyclin-dependent kinase substrate 1 | NUCKS1   | 12 | 5  | 27.2 |                | 0.760 |   |
| P84090     | Enhancer of rudimentary homolog                                   | ERH      | 5  | 3  | 33.7 |                | 0.764 | + |
| O15144     | Actin-related protein 2/3 complex subunit 2                       | ARPC2    | 4  | 2  | 6    |                | 0.768 |   |
| P04792     | Heat shock protein beta-1                                         | HSPB1    | 4  | 2  | 10.2 |                | 0.769 |   |
| P10412     | Histone H1.4                                                      | HIST1H1E | 8  | 4  | 14.2 |                | 0.773 | + |
| O94760     | N(G),N(G)-dimethylarginine dimethylaminohydrolase 1               | DDAH1    | 2  | 2  | 4.9  | Only 2nd batch | 0.773 |   |
| Q9BRA2     | Thioredoxin domain-containing protein 17                          | TXNDC17  | 5  | 2  | 18.7 |                | 0.774 | + |
| P35237     | Serpin B6                                                         | SERPINB6 | 2  | 2  | 6.9  | Only 2nd batch | 0.774 |   |
| E9PKW1     | Latent-transforming growth factor beta-binding protein 3          | LTBP3    | 8  | 5  | 6.8  |                | 0.780 |   |
| P15144     | Aminopeptidase N                                                  | ANPEP    | 3  | 2  | 2.5  |                | 0.780 |   |
| P05556     | Integrin beta-1                                                   | ITGB1    | 14 | 5  | 7.1  |                | 0.782 |   |
| P11717     | Cation-independent mannose-6-phosphate receptor                   | IGF2R    | 8  | 7  | 3.3  |                | 0.783 |   |
| A0A087WWU8 |                                                                   | TPM3     | 25 | 12 | 41   |                | 0.783 |   |
| E2QRB9     | Thioredoxin reductase 1, cytoplasmic                              | TXNRD1   | 16 | 7  | 14.6 |                | 0.784 | + |
| Q9BTY2     | Plasma alpha-L-fucosidase                                         | FUCA2    | 7  | 5  | 12.6 |                | 0.787 |   |
| P61088     | Ubiquitin-conjugating enzyme E2 N                                 | UBE2N    | 2  | 2  | 13.2 |                | 0.790 |   |
| P48637     | Glutathione synthetase                                            | GSS      | 3  | 3  | 5.5  |                | 0.793 |   |
| A0A087WY82 | Junctional adhesion molecule A                                    | F11R     | 7  | 3  | 15.4 |                | 0.796 |   |
| P53999     | Activated RNA polymerase II transcriptional coactivator p15       | SUB1     | 6  | 4  | 34.6 |                | 0.798 |   |
| P34932     | Heat shock 70 kDa protein 4                                       | HSPA4    | 21 | 9  | 16.3 |                | 0.798 |   |
| P13796     | Plastin-2                                                         | LCP1     | 2  | 2  | 5.7  | Only 2nd batch | 0.798 |   |
| P40926     | Malate dehydrogenase, mitochondrial                               | MDH2     | 19 | 6  | 21.9 |                | 0.799 |   |
| K7ELW0     | Protein DJ-1                                                      | PARK7    | 26 | 5  | 27.8 |                | 0.801 |   |

|        |                                                                  |           |     |    |      |                |       |   |
|--------|------------------------------------------------------------------|-----------|-----|----|------|----------------|-------|---|
| P25788 | Proteasome subunit alpha type-3                                  | PSMA3     | 9   | 5  | 16.9 |                | 0.805 |   |
| P19883 | Follistatin                                                      | FST       | 35  | 11 | 38.7 |                | 0.818 |   |
| P17096 | High mobility group protein HMG-I/HMG-Y                          | HMGA1     | 15  | 5  | 48.6 |                | 0.825 | + |
| P00492 | Hypoxanthine-guanine phosphoribosyltransferase                   | HPRT1     | 6   | 3  | 17.9 |                | 0.826 |   |
| Q00610 | Clathrin heavy chain 1                                           | CLTC      | 15  | 11 | 8.7  |                | 0.831 |   |
| Q14914 | Prostaglandin reductase 1                                        | PTGR1     | 2   | 2  | 7.3  | Only 2nd batch | 0.835 |   |
| P07195 | L-lactate dehydrogenase B chain                                  | LDHB      | 38  | 9  | 24   |                | 0.835 |   |
| B1AK87 | F-actin-capping protein subunit beta                             | CAPZB     | 2   | 2  | 11.5 | Only 2nd batch | 0.836 |   |
| P31949 | Protein S100-A11                                                 | S100A11   | 7   | 4  | 31.4 |                | 0.837 |   |
| P61457 | Pterin-4-alpha-carbinolamine dehydratase                         | PCBD1     | 6   | 3  | 35.6 |                | 0.839 | + |
| P26022 | Pentraxin-related protein PTX3                                   | PTX3      | 12  | 4  | 16.3 |                | 0.839 |   |
| P08107 | Heat shock 70 kDa protein 1A/1B                                  | HSPA1A    | 18  | 8  | 14.5 |                | 0.844 | + |
| Q9UBX1 | Cathepsin F                                                      | CTSF      | 3   | 3  | 6.8  | Only 1st batch | 0.844 |   |
| P07602 | Proactivator polypeptide                                         | PSAP      | 124 | 20 | 41.8 |                | 0.847 |   |
| Q5SZX9 | T-complex protein 1 subunit gamma                                | CCT3      | 3   | 3  | 13   | Only 2nd batch | 0.848 |   |
| H0YFA9 | N-acetylglucosamine-6-sulfatase                                  | GNS       | 6   | 4  | 12.9 |                | 0.849 |   |
| P04080 | Cystatin-B                                                       | CSTB      | 5   | 2  | 24.5 |                | 0.849 |   |
| P09382 | Galectin-1                                                       | LGALS1    | 13  | 5  | 45.2 |                | 0.850 |   |
| Q96L35 | Ephrin type-B receptor 4                                         | EPHB4     | 5   | 4  | 6.5  |                | 0.851 |   |
| P20933 | N(4)-(beta-N-acetylglucosaminy)-L-asparaginase                   | AGA       | 3   | 3  | 10.1 |                | 0.853 |   |
| P07339 | Cathepsin D                                                      | CTSD      | 55  | 9  | 27.4 |                | 0.856 |   |
| O43854 | EGF-like repeat and discoidin I-like domain-containing protein 3 | EDIL3     | 26  | 9  | 21   |                | 0.859 |   |
| Q5T7C4 | High mobility group protein B1                                   | HMGB1     | 20  | 6  | 30.4 |                | 0.860 |   |
| Q15149 | Plectin                                                          | PLEC      | 29  | 22 | 5.2  |                | 0.864 |   |
| Q06830 | Peroxiredoxin-1                                                  | PRDX1     | 34  | 7  | 39.2 |                | 0.866 |   |
| P63104 | 14-3-3 protein zeta/delta                                        | YWHAZ     | 15  | 7  | 37.1 |                | 0.873 |   |
| O14745 | Na(+)/H(+) exchange regulatory cofactor NHE-RF1                  | SLC9A3R1  | 3   | 2  | 6.7  | Only 2nd batch | 0.873 |   |
| P10253 | Lysosomal alpha-glucosidase                                      | GAA       | 14  | 5  | 5.5  |                | 0.875 |   |
| P23284 | Peptidyl-prolyl cis-trans isomerase B                            | PPIB      | 8   | 5  | 25.5 |                | 0.877 |   |
| P25398 | 40S ribosomal protein S12                                        | RPS12     | 5   | 3  | 22   |                | 0.881 |   |
| P20962 | Parathymosin                                                     | PTMS      | 5   | 2  | 22.5 |                | 0.882 | + |
| P08670 | Vimentin                                                         | VIM       | 20  | 8  | 17.4 |                | 0.884 |   |
| Q01518 | Adenylyl cyclase-associated protein 1                            | CAP1      | 8   | 5  | 10.5 |                | 0.885 |   |
| O75976 | Carboxypeptidase D                                               | CPD       | 2   | 2  | 1.7  | Only 2nd batch | 0.886 | + |
| Q99519 | Sialidase-1                                                      | NEU1      | 5   | 3  | 8.2  |                | 0.886 | + |
| F8W914 | Reticulon-4                                                      | RTN4      | 2   | 2  | 7.8  | Only 2nd batch | 0.889 |   |
| P55263 | Adenosine kinase                                                 | ADK       | 3   | 2  | 8.6  |                | 0.892 | + |
| E7EMM4 | Acid ceramidase                                                  | ASAH1     | 6   | 4  | 9.7  |                | 0.893 |   |
| P62258 | 14-3-3 protein epsilon                                           | YWHAE     | 14  | 5  | 17.3 |                | 0.894 |   |
| E7ET40 | Urokinase-type plasminogen activator                             | PLAU      | 75  | 16 | 40.1 |                | 0.894 |   |
| A6NKB8 | Aminopeptidase B                                                 | RNPEP     | 10  | 7  | 16.5 |                | 0.895 |   |
| P55072 | Transitional endoplasmic reticulum ATPase                        | VCP       | 50  | 19 | 30.8 |                | 0.898 |   |
| E9PMA0 | Apoptosis-inducing factor 1, mitochondrial                       | AIFM1     | 2   | 2  | 8.8  | Only 2nd batch | 0.898 |   |
| Q96QK1 | Vacuolar protein sorting-associated protein 35                   | VPS35     | 3   | 3  | 5.7  | Only 2nd batch | 0.898 |   |
| P63261 | Actin, cytoplasmic 2                                             | ACTG1     | 78  | 12 | 34.7 |                | 0.899 |   |
| Q32Q12 | Nucleoside diphosphate kinase                                    | NME1-NME2 | 24  | 7  | 41.8 |                | 0.903 |   |
| O00468 | Agrin                                                            | AGRN      | 139 | 36 | 26.5 |                | 0.904 |   |
| H0Y2P0 | CD44 antigen                                                     | CD44      | 10  | 4  | 20.9 |                | 0.904 |   |
| P19338 | Nucleolin                                                        | NCL       | 21  | 13 | 13.1 |                | 0.907 |   |
| D6R9P3 | Heterogeneous nuclear ribonucleoprotein A/B                      | HNRNPAB   | 3   | 2  | 8.2  |                | 0.908 |   |

|            |                                                                  |          |     |    |      |                |       |   |
|------------|------------------------------------------------------------------|----------|-----|----|------|----------------|-------|---|
| P10909     | Clusterin                                                        | CLU      | 27  | 8  | 23.4 |                | 0.914 |   |
| P08581     | Hepatocyte growth factor receptor                                | MET      | 18  | 9  | 8.1  |                | 0.914 |   |
| P53396     | ATP-citrate synthase                                             | ACLY     | 4   | 4  | 4.2  |                | 0.916 |   |
| P14324     | Farnesyl pyrophosphate synthase                                  | FDPS     | 5   | 3  | 9.3  |                | 0.919 |   |
| P62328     | Thymosin beta-4                                                  | TMSB4X   | 7   | 2  | 43.2 |                | 0.920 |   |
| P23526     | Adenosylhomocysteinase                                           | AHCY     | 13  | 5  | 10.6 |                | 0.921 |   |
| H0Y929     | PDZ and LIM domain protein 5                                     | PDLIM5   | 2   | 2  | 24.7 | Only 1st batch | 0.923 |   |
| A0A0C4DGZ9 | Tripeptidyl-peptidase 1                                          | TPP1     | 14  | 6  | 18.7 |                | 0.925 | + |
| P11413     | Glucose-6-phosphate 1-dehydrogenase                              | G6PD     | 8   | 5  | 13.2 |                | 0.925 |   |
| P62993     | Growth factor receptor-bound protein 2                           | GRB2     | 3   | 2  | 12   |                | 0.927 |   |
| P21980     | Protein-glutamine gamma-glutamyltransferase 2                    | TGM2     | 9   | 5  | 10.3 |                | 0.930 | + |
| Q92692     | Poliovirus receptor-related protein 2                            | PVRL2    | 3   | 2  | 4.3  |                | 0.932 |   |
| P05362     | Intercellular adhesion molecule 1                                | ICAM1    | 22  | 7  | 16   |                | 0.933 |   |
| P46940     | Ras GTPase-activating-like protein IQGAP1                        | IQGAP1   | 5   | 4  | 3.3  |                | 0.934 |   |
| P22314     | Ubiquitin-like modifier-activating enzyme 1                      | UBA1     | 10  | 5  | 6.3  |                | 0.935 |   |
| F5H365     | Protein transport protein Sec23A                                 | SEC23A   | 3   | 2  | 4.6  |                | 0.936 |   |
| P04075     | Fructose-bisphosphate aldolase A                                 | ALDOA    | 74  | 17 | 44   |                | 0.937 |   |
| H3BVA8     | Lysine--tRNA ligase                                              | KARS     | 4   | 2  | 7.8  |                | 0.941 | + |
| O60911     | Cathepsin L2                                                     | CTSL2    | 3   | 2  | 8.7  |                | 0.941 |   |
| Q71DI3     | Histone H3.2                                                     | HIST2H3A | 4   | 2  | 13.2 |                | 0.942 | + |
| Q15223     | Poliovirus receptor-related protein 1                            | PVRL1    | 3   | 2  | 3.7  |                | 0.944 |   |
| P00441     | Superoxide dismutase [Cu-Zn]                                     | SOD1     | 31  | 7  | 39   |                | 0.944 |   |
| P16870     | Carboxypeptidase E                                               | CPE      | 7   | 4  | 11.1 |                | 0.950 |   |
| H3BS10     | Beta-hexosaminidase                                              | HEXA     | 9   | 5  | 9.4  |                | 0.954 |   |
| O75083     | WD repeat-containing protein 1                                   | WDR1     | 10  | 5  | 10.6 |                | 0.954 |   |
| Q9NZV1     | Cysteine-rich motor neuron 1 protein                             | CRIM1    | 20  | 10 | 16.5 |                | 0.957 | + |
| P28799     | Granulins                                                        | GRN      | 131 | 25 | 52.1 |                | 0.957 |   |
| Q06210     | Glutamine--fructose-6-phosphate aminotransferase [isomerizing] 1 | GFPT1    | 3   | 3  | 8.3  |                | 0.958 | + |
| Q9Y3C6     | Peptidyl-prolyl cis-trans isomerase-like 1                       | PPIL1    | 3   | 2  | 16.3 |                | 0.960 |   |
| F8VQY6     | 60S acidic ribosomal protein P0-like                             | RPLP0    | 4   | 2  | 23.2 |                | 0.960 |   |
| P17900     | Ganglioside GM2 activator                                        | GM2A     | 13  | 3  | 21.2 |                | 0.960 |   |
| P00390     | Glutathione reductase, mitochondrial                             | GSR      | 3   | 2  | 4.2  |                | 0.961 |   |
| G3V1A4     | Cofilin-1                                                        | CFL1     | 22  | 7  | 47   |                | 0.961 |   |
| P20618     | Proteasome subunit beta type-1                                   | PSMB1    | 8   | 3  | 18.7 |                | 0.964 |   |
| P61158     | Actin-related protein 3                                          | ACTR3    | 8   | 4  | 14.6 |                | 0.965 |   |
| F2Z2W6     | Non-histone chromosomal protein HMG-14                           | HMGN1    | 3   | 2  | 22.7 |                | 0.966 | + |
| P61769     | Beta-2-microglobulin                                             | B2M      | 10  | 4  | 25.2 |                | 0.967 |   |
| Q15084     | Protein disulfide-isomerase A6                                   | PDIA6    | 5   | 3  | 9.1  |                | 0.967 |   |
| P68371     | Tubulin beta-4B chain                                            | TUBB4B   | 19  | 5  | 14.6 |                | 0.967 |   |
| Q9Y5S9     | RNA-binding protein 8A                                           | RBM8A    | 2   | 2  | 10.9 |                | 0.967 |   |
| H0Y2X5     | Aldehyde dehydrogenase family 1 member A3                        | ALDH1A3  | 2   | 2  | 2.7  |                | 0.968 | + |
| P35241     | Radixin                                                          | RDX      | 10  | 6  | 7.5  |                | 0.970 | + |
| Q99584     | Protein S100-A13                                                 | S100A13  | 5   | 2  | 20.4 |                | 0.970 | + |
| P00338     | L-lactate dehydrogenase A chain                                  | LDHA     | 54  | 13 | 32.5 |                | 0.970 |   |
| P50395     | Rab GDP dissociation inhibitor beta                              | GDI2     | 22  | 10 | 26.5 |                | 0.971 |   |
| D6REQ6     | Ribonuclease T2                                                  | RNASET2  | 5   | 2  | 13.3 |                | 0.971 |   |
| J3KTF8     | Rho GDP-dissociation inhibitor 1                                 | ARHGDI1  | 5   | 4  | 20.2 |                | 0.971 |   |
| P22102     | Trifunctional purine biosynthetic protein adenosine-3            | GART     | 6   | 4  | 5.4  |                | 0.974 |   |
| Q14315     | Filamin-C                                                        | FLNC     | 21  | 13 | 6.7  |                | 0.976 |   |
| H3BT58     | Coactosin-like protein                                           | COTL1    | 12  | 3  | 38.4 |                | 0.977 |   |

|            |                                                                      |             |    |    |      |                |       |   |
|------------|----------------------------------------------------------------------|-------------|----|----|------|----------------|-------|---|
| P12955     | Xaa-Pro dipeptidase                                                  | PEPD        | 6  | 2  | 6.5  |                | 0.978 |   |
| P62158     | Calmodulin                                                           | CALM1       | 16 | 8  | 40.3 |                | 0.979 | + |
| Q9UKM7     | Endoplasmic reticulum mannosyl-oligosaccharide 1,2-alpha-mannosidase | MAN1B1      | 2  | 2  | 4    |                | 0.981 |   |
| P54727     | UV excision repair protein RAD23 homolog B                           | RAD23B      | 9  | 4  | 12.2 |                | 0.981 |   |
| O43707     | Alpha-actinin-4                                                      | ACTN4       | 70 | 27 | 32.2 |                | 0.983 |   |
| P48745     | Protein NOV homolog                                                  | NOV         | 13 | 6  | 18.5 |                | 0.986 |   |
| P07225     | Vitamin K-dependent protein S                                        | PROS1       | 8  | 5  | 10.2 |                | 0.988 |   |
| P78417     | Glutathione S-transferase omega-1                                    | GSTO1       | 6  | 4  | 17   |                | 0.988 |   |
| P30086     | Phosphatidylethanolamine-binding protein 1                           | PEBP1       | 10 | 3  | 23.5 |                | 0.990 |   |
| P22626     | Heterogeneous nuclear ribonucleoproteins A2/B1                       | HNRNPA2B1   | 21 | 6  | 18.1 |                | 0.991 |   |
| O00241     | Signal-regulatory protein beta-1                                     | SIRPB1      | 9  | 6  | 16.3 |                | 0.992 |   |
| C9JXG8     | Ran-specific GTPase-activating protein                               | RANBP1      | 3  | 2  | 20.7 |                | 0.993 |   |
| Q09028     | Histone-binding protein RBBP4                                        | RBBP4       | 3  | 3  | 8.7  |                | 0.994 |   |
| Q07955     | Serine/arginine-rich splicing factor 1                               | SRSF1       | 4  | 3  | 11.7 |                | 0.994 |   |
| C9JFR7     | Cytochrome c                                                         | CYCS        | 19 | 3  | 25.7 |                | 0.995 |   |
| Q13813     | Spectrin alpha chain, non-erythrocytic 1                             | SPTAN1      | 18 | 11 | 5.7  |                | 0.996 | + |
| P07686     | Beta-hexosaminidase subunit beta                                     | HEXB        | 24 | 9  | 20.1 |                | 0.998 |   |
| Q13442     | 28 kDa heat- and acid-stable phosphoprotein                          | PDAP1       | 6  | 5  | 32   |                | 1.000 |   |
| P29317     | Ephrin type-A receptor 2                                             | EPHA2       | 4  | 3  | 4    |                | 1.006 | + |
| Q9ULF5     | Zinc transporter ZIP10                                               | SLC39A10    | 3  | 3  | 4.7  |                | 1.006 |   |
| O94985     | Calsyntenin-1                                                        | CLSTN1      | 60 | 14 | 14.6 |                | 1.007 |   |
| Q96C90     | Protein phosphatase 1 regulatory subunit 14B                         | PPP1R14B    | 2  | 2  | 17   |                | 1.007 |   |
| E9PSF4     | 40S ribosomal protein S3                                             | RPS3        | 2  | 2  | 21.4 |                | 1.008 |   |
| D6RBE9     | Annexin                                                              | ANXA5       | 4  | 2  | 10.5 |                | 1.010 |   |
| A2A2V1     | Major prion protein                                                  | PRNP        | 9  | 3  | 12.4 |                | 1.011 |   |
| Q7KZF4     | Staphylococcal nuclease domain-containing protein 1                  | SND1        | 8  | 3  | 4.1  |                | 1.011 |   |
| P14550     | Alcohol dehydrogenase [NADP(+)]                                      | AKR1A1      | 2  | 2  | 7.7  |                | 1.012 |   |
| A0A087X0D5 | Pro-cathepsin H                                                      | CTSH        | 3  | 3  | 10.2 |                | 1.014 |   |
| O60568     | Procollagen-lysine,2-oxoglutarate 5-dioxygenase 3                    | PLOD3       | 9  | 6  | 7.6  |                | 1.015 |   |
| P15311     | Ezrin                                                                | EZR         | 26 | 13 | 15.9 |                | 1.016 |   |
| Q99538     | Legumain                                                             | LGMN        | 12 | 6  | 16.4 |                | 1.019 |   |
| Q9UHL4     | Dipeptidyl peptidase 2                                               | DPP7        | 6  | 3  | 8.1  |                | 1.024 |   |
| P00491     | Purine nucleoside phosphorylase                                      | PNP         | 15 | 4  | 19.4 |                | 1.025 |   |
| H0YCR7     |                                                                      | RNH1        | 3  | 3  | 10.5 |                | 1.032 |   |
| P09341     | Growth-regulated alpha protein                                       | CXCL1       | 36 | 4  | 44.9 |                | 1.032 |   |
| A6NJA2     | Ubiquitin carboxyl-terminal hydrolase                                | USP14       | 5  | 4  | 10.7 |                | 1.032 |   |
| P03956     | Interstitial collagenase                                             | MMP1        | 6  | 3  | 8.1  |                | 1.034 |   |
| G5E9W8     | Glycogenin-1                                                         | GYG1        | 4  | 2  | 10.9 |                | 1.039 | + |
| H0YBG7     | Heterogeneous nuclear ribonucleoprotein H2                           | HNRNPH1     | 3  | 2  | 9.7  |                | 1.039 |   |
| Q8WUM4     | Programmed cell death 6-interacting protein                          | PDCD6IP     | 6  | 5  | 7.1  |                | 1.041 |   |
| H0Y2Y8     | Zyxin                                                                | ZYX         | 3  | 3  | 9.3  |                | 1.041 |   |
| A0A0A0MSA9 | Poliovirus receptor                                                  | PVR         | 7  | 3  | 8.4  |                | 1.047 |   |
| P06280     | Alpha-galactosidase A                                                | GLA         | 4  | 3  | 8.9  |                | 1.047 |   |
| P67809     | Nuclease-sensitive element-binding protein 1                         | YBX1        | 8  | 3  | 21   |                | 1.047 |   |
| Q92626     | Peroxidasin homolog                                                  | PXDN        | 11 | 5  | 4.5  |                | 1.054 |   |
| Q29980     | MHC class I polypeptide-related sequence B                           | MICB        | 2  | 2  | 6.5  | Only 2nd batch | 1.058 | + |
| H3BQZ7     | Heterogeneous nuclear ribonucleoprotein U-like protein 2             | hCG_2044799 | 4  | 3  | 5    |                | 1.060 | + |
| P11021     | 78 kDa glucose-regulated protein                                     | HSPA5       | 74 | 22 | 39.3 |                | 1.061 |   |
| P67936     | Tropomyosin alpha-4 chain                                            | TPM4        | 10 | 4  | 14.1 |                | 1.068 |   |
| P50990     | T-complex protein 1 subunit theta                                    | CCT8        | 5  | 4  | 9.3  |                | 1.070 |   |

|            |                                                               |           |    |    |      |                |       |   |
|------------|---------------------------------------------------------------|-----------|----|----|------|----------------|-------|---|
| P23142     | Fibulin-1                                                     | FBLN1     | 11 | 6  | 12.9 |                | 1.073 |   |
| F5H3C5     | Superoxide dismutase [Mn], mitochondrial                      | SOD2      | 6  | 4  | 40.5 |                | 1.075 |   |
| Q02818     | Nucleobindin-1                                                | NUCB1     | 58 | 19 | 43.2 |                | 1.082 |   |
| F5H6V7     | Tumor necrosis factor receptor superfamily member 1A          | TNFRSF1A  | 6  | 3  | 15.4 |                | 1.083 |   |
| P01009     | Alpha-1-antitrypsin                                           | SERPINA1  | 15 | 7  | 15.3 |                | 1.083 |   |
| P48723     | Heat shock 70 kDa protein 13                                  | HSPA13    | 8  | 5  | 14.2 |                | 1.083 |   |
| P28074     | Proteasome subunit beta type-5                                | PSMB5     | 22 | 7  | 27   |                | 1.083 |   |
| J3KN67     |                                                               | TPM3      | 3  | 2  | 9.1  |                | 1.085 |   |
| F5GXJ9     | CD166 antigen                                                 | ALCAM     | 14 | 8  | 15   |                | 1.087 |   |
| P31431     | Syndecan-4                                                    | SDC4      | 21 | 6  | 25.3 |                | 1.088 | + |
| Q9UKY7     | Protein CDV3 homolog                                          | CDV3      | 8  | 3  | 33.7 |                | 1.089 |   |
| P56159     | GDNF family receptor alpha-1                                  | GFRA1     | 17 | 7  | 17.8 |                | 1.090 | + |
| E9PQ14     | Dipeptidyl peptidase 3                                        | DPP3      | 5  | 3  | 21.5 |                | 1.090 |   |
| P01137     | Transforming growth factor beta-1                             | TGFB1     | 6  | 3  | 9.5  |                | 1.093 |   |
| Q12906     | Interleukin enhancer-binding factor 3                         | ILF3      | 5  | 3  | 4    |                | 1.093 |   |
| O75326     | Semaphorin-7A                                                 | SEMA7A    | 17 | 9  | 17   |                | 1.093 |   |
| Q9GZP8     | Immortalization up-regulated protein                          | IMUP      | 4  | 2  | 16   |                | 1.095 | + |
| A0A087X253 | AP-2 complex subunit beta                                     | AP2B1     | 6  | 4  | 5.3  |                | 1.097 | + |
| Q9NP84     | Tumor necrosis factor receptor superfamily member 12A         | TNFRSF12A | 10 | 2  | 23.3 |                | 1.097 |   |
| B8ZZL8     | 10 kDa heat shock protein, mitochondrial                      | HSPE1     | 7  | 4  | 27.7 |                | 1.101 |   |
| P43251     | Biotinidase                                                   | BTD       | 5  | 2  | 5.7  |                | 1.102 |   |
| E9PLK3     | Puromycin-sensitive aminopeptidase                            | NPEPPS    | 11 | 3  | 3.7  |                | 1.105 |   |
| O00754     | Lysosomal alpha-mannosidase                                   | MAN2B1    | 9  | 5  | 5.6  |                | 1.109 |   |
| D6RG15     | Twinfilin-2                                                   | TWF2      | 4  | 3  | 18.1 |                | 1.110 |   |
| A0A096LNZ9 | Ubiquitin-like protein ISG15                                  | ISG15     | 4  | 2  | 15.4 |                | 1.115 | + |
| P26639     | Threonine--tRNA ligase, cytoplasmic                           | TARS      | 6  | 4  | 5.5  |                | 1.117 |   |
| P28066     | Proteasome subunit alpha type-5                               | PSMA5     | 10 | 3  | 21.2 |                | 1.118 |   |
| P10124     | Serglycin                                                     | SRGN      | 13 | 2  | 17.1 |                | 1.123 |   |
| G3V295     | Proteasome subunit alpha type                                 | PSMA6     | 10 | 4  | 16.7 |                | 1.128 |   |
| Q9UQ80     | Proliferation-associated protein 2G4                          | PA2G4     | 8  | 5  | 16.8 |                | 1.131 |   |
| Q02790     | Peptidyl-prolyl cis-trans isomerase FKBP4                     | FKBP4     | 7  | 4  | 14.8 |                | 1.131 |   |
| E9PK47     | Phosphorylase                                                 | PYGL      | 5  | 4  | 5.5  |                | 1.133 |   |
| Q86UY0     | Thioredoxin domain-containing protein 5                       | TXNDC5    | 14 | 4  | 13.3 |                | 1.134 | + |
| P30530     | Tyrosine-protein kinase receptor UFO                          | AXL       | 25 | 5  | 6.2  |                | 1.134 |   |
| Q99436     | Proteasome subunit beta type-7                                | PSMB7     | 7  | 4  | 15.9 |                | 1.138 |   |
| H0YEY4     | ADP-sugar pyrophosphatase                                     | NUDT5     | 3  | 2  | 11.7 |                | 1.139 |   |
| P00918     | Carbonic anhydrase 2                                          | CA2       | 4  | 3  | 13.1 |                | 1.141 |   |
| P39687     | Acidic leucine-rich nuclear phosphoprotein 32 family member A | ANP32A    | 9  | 3  | 13.7 |                | 1.141 |   |
| P26038     | Moesin                                                        | MSN       | 14 | 5  | 12.1 |                | 1.142 |   |
| O00151     | PDZ and LIM domain protein 1                                  | PDLIM1    | 7  | 2  | 8.5  |                | 1.146 |   |
| Q16531     | DNA damage-binding protein 1                                  | DDB1      | 7  | 5  | 6.1  |                | 1.148 |   |
| O43396     | Thioredoxin-like protein 1                                    | TXNL1     | 10 | 4  | 19.4 |                | 1.150 |   |
| P13639     | Elongation factor 2                                           | EEF2      | 31 | 11 | 15.4 |                | 1.151 |   |
| Q9NPR2     | Semaphorin-4B                                                 | SEMA4B    | 15 | 5  | 7.2  |                | 1.153 |   |
| Q13308     | Inactive tyrosine-protein kinase 7                            | PTK7      | 4  | 3  | 5.1  |                | 1.156 |   |
| H7BYD9     | Peptidyl-glycine alpha-amidating monooxygenase                | PAM       | 5  | 3  | 3.5  |                | 1.157 |   |
| A0A0C4DFS8 | Nicotinamide phosphoribosyltransferase                        | NAMPT     | 18 | 6  | 19   |                | 1.158 |   |
| E9PNW4     | CD59 glycoprotein                                             | CD59      | 6  | 2  | 16.7 |                | 1.160 |   |
| P30101     | Protein disulfide-isomerase A3                                | PDIA3     | 39 | 9  | 18.6 |                | 1.162 |   |
| Q14847     | LIM and SH3 domain protein 1                                  | LASP1     | 2  | 2  | 6.9  | Only 2nd batch | 1.164 |   |

|            |                                                                      |          |     |    |      |                |       |   |
|------------|----------------------------------------------------------------------|----------|-----|----|------|----------------|-------|---|
| A0A087X054 | Hypoxia up-regulated protein 1                                       | HYOU1    | 7   | 3  | 4.8  |                | 1.165 |   |
| P27816     | Microtubule-associated protein 4                                     | MAP4     | 8   | 7  | 8.4  |                | 1.170 |   |
| P29401     | Transketolase                                                        | TKT      | 57  | 17 | 29.5 |                | 1.173 |   |
| P07237     | Protein disulfide-isomerase                                          | P4HB     | 28  | 13 | 26   |                | 1.174 |   |
| D6RBD0     | Guanine nucleotide-binding protein subunit beta-2-like 1             | GNB2L1   | 3   | 2  | 16.2 |                | 1.174 |   |
| A0A087WYV8 | Fibrillin-2                                                          | FBN2     | 15  | 9  | 4.8  |                | 1.178 |   |
| I3L397     | Eukaryotic translation initiation factor 5A-1                        | EIF5A    | 16  | 4  | 24   |                | 1.179 |   |
| Q9BQE3     | Tubulin alpha-1C chain                                               | TUBA1C   | 20  | 7  | 14.9 |                | 1.179 |   |
| Q9BRK5     | 45 kDa calcium-binding protein                                       | SDF4     | 18  | 7  | 25.7 |                | 1.180 |   |
| E5RG62     | Putative deoxyribonuclease TATDN1                                    | TATDN1   | 2   | 2  | 19.4 | Only 1st batch | 1.184 | + |
| P06744     | Glucose-6-phosphate isomerase                                        | GPI      | 25  | 9  | 16.5 |                | 1.186 |   |
| P09467     | Fructose-1,6-bisphosphatase 1                                        | FBP1     | 7   | 3  | 11.8 |                | 1.188 |   |
| P49588     | Alanine--tRNA ligase, cytoplasmic                                    | AARS     | 7   | 6  | 6.4  |                | 1.189 |   |
| Q14126     | Desmoglein-2                                                         | DSG2     | 24  | 6  | 7.2  |                | 1.194 |   |
| E9PIA8     | Palmitoyl-protein thioesterase 1                                     | PPT1     | 11  | 3  | 18.6 |                | 1.194 |   |
| Q12841     | Follistatin-related protein 1                                        | FSTL1    | 48  | 9  | 27.9 |                | 1.195 |   |
| Q16706     | Alpha-mannosidase 2                                                  | MAN2A1   | 11  | 8  | 7.6  |                | 1.198 |   |
| P98160     | Basement membrane-specific heparan sulfate proteoglycan core protein | HSPG2    | 53  | 32 | 9.1  |                | 1.200 |   |
| A2A2V4     | Vascular endothelial growth factor A                                 | VEGFA    | 9   | 3  | 26.4 |                | 1.200 |   |
| P31939     | Bifunctional purine biosynthesis protein PURH                        | ATIC     | 2   | 2  | 4.7  | Only 2nd batch | 1.206 |   |
| P62633     | Cellular nucleic acid-binding protein                                | CNBP     | 10  | 5  | 33.9 |                | 1.206 |   |
| D6RIU4     | Vesicular integral-membrane protein VIP36                            | LMAN2    | 3   | 2  | 11.5 |                | 1.207 |   |
| A0A087WV01 | Putative elongation factor 1-alpha-like 3                            | EEF1A1P5 | 19  | 5  | 12   |                | 1.209 |   |
| Q8WX77     | Insulin-like growth factor-binding protein-like 1                    | IGFBPL1  | 4   | 2  | 6.1  |                | 1.215 |   |
| P10599     | Thioredoxin                                                          | TXN      | 15  | 2  | 21   |                | 1.216 |   |
| P10809     | 60 kDa heat shock protein, mitochondrial                             | HSPD1    | 10  | 5  | 11   |                | 1.217 |   |
| P35052     | Glypican-1                                                           | GPC1     | 21  | 9  | 21.3 |                | 1.219 | + |
| P05387     | 60S acidic ribosomal protein P2                                      | RPLP2    | 9   | 2  | 42.6 |                | 1.220 |   |
| P52907     | F-actin-capping protein subunit alpha-1                              | CAPZA1   | 6   | 4  | 17.1 |                | 1.224 |   |
| F8VZJ2     | Nascent polypeptide-associated complex subunit alpha                 | NACA     | 7   | 3  | 30.9 |                | 1.225 |   |
| A0A087WVM3 | Protein CYR61                                                        | CYR61    | 28  | 8  | 23   |                | 1.226 | + |
| P18206     | Vinculin                                                             | VCL      | 93  | 33 | 30.4 |                | 1.226 |   |
| P08238     | Heat shock protein HSP 90-beta                                       | HSP90AB1 | 123 | 31 | 39.6 |                | 1.231 |   |
| C9JMY1     | Insulin-like growth factor-binding protein 2                         | IGFBP2   | 11  | 5  | 30.9 |                | 1.236 |   |
| P52209     | 6-phosphogluconate dehydrogenase, decarboxylating                    | PGD      | 19  | 8  | 21.7 |                | 1.241 |   |
| Q92520     | Protein FAM3C                                                        | FAM3C    | 12  | 4  | 17.2 |                | 1.244 |   |
| Q99460     | 26S proteasome non-ATPase regulatory subunit 1                       | PSMD1    | 2   | 2  | 2.9  | Only 2nd batch | 1.246 |   |
| Q9NRX4     | 14 kDa phosphohistidine phosphatase                                  | PHPT1    | 4   | 2  | 16   |                | 1.248 | + |
| F5GX11     | Proteasome subunit alpha type-1                                      | PSMA1    | 24  | 8  | 29.8 |                | 1.251 | + |
| P62942     | Peptidyl-prolyl cis-trans isomerase FKBP1A                           | FKBP1A   | 24  | 3  | 39.8 |                | 1.253 |   |
| P07737     | Profilin-1                                                           | PFN1     | 46  | 8  | 65   |                | 1.255 |   |
| P78324     | Tyrosine-protein phosphatase non-receptor type substrate 1           | SIRPA    | 5   | 3  | 9.5  |                | 1.258 |   |
| P09874     | Poly [ADP-ribose] polymerase 1                                       | PARP1    | 2   | 2  | 3.1  | Only 2nd batch | 1.259 |   |
| E9PGT1     | Translin                                                             | TSN      | 2   | 2  | 12.6 | Only 1st batch | 1.261 |   |
| Q9ULV4     | Coronin-1C                                                           | CORO1C   | 3   | 2  | 4.4  |                | 1.264 |   |
| S4R3Q6     | Vacuolar protein sorting-associated protein 26A                      | VPS26A   | 4   | 2  | 11.5 |                | 1.272 |   |
| O95274     | Ly6/PLAUR domain-containing protein 3                                | LYPD3    | 5   | 4  | 15.3 |                | 1.278 | + |
| P26006     | Integrin alpha-3                                                     | ITGA3    | 7   | 5  | 4.8  |                | 1.281 | + |
| E7ERF2     | T-complex protein 1 subunit alpha                                    | TCP1     | 4   | 2  | 4.6  |                | 1.282 |   |
| P05067     | Amyloid beta A4 protein                                              | APP      | 68  | 16 | 25.8 |                | 1.283 |   |



|            |                                                                |          |     |    |      |                |       |   |
|------------|----------------------------------------------------------------|----------|-----|----|------|----------------|-------|---|
| P09936     | Ubiquitin carboxyl-terminal hydrolase isozyme L1               | UCHL1    | 15  | 5  | 28.7 |                | 1.283 |   |
| A0A0C4DH07 | Latent-transforming growth factor beta-binding protein 4       | LTBP4    | 5   | 4  | 4    |                | 1.284 |   |
| P62987     | Ubiquitin-60S ribosomal protein L40                            | UBA52    | 16  | 4  | 32   |                | 1.287 | + |
| P07858     | Cathepsin B                                                    | CTSB     | 35  | 9  | 33.9 |                | 1.287 |   |
| K7EP46     | Thimet oligopeptidase                                          | THOP1    | 3   | 2  | 5.1  | Only 2nd batch | 1.288 |   |
| Q16851     | UTP--glucose-1-phosphate uridylyltransferase                   | UGP2     | 2   | 2  | 4.3  |                | 1.293 | + |
| P07711     | Cathepsin L1                                                   | CTSL1    | 13  | 5  | 17.1 |                | 1.299 |   |
| A0A087X2B5 | Basigin                                                        | BSG      | 6   | 2  | 14.5 |                | 1.299 |   |
| P30041     | Peroxiredoxin-6                                                | PRDX6    | 9   | 3  | 15.2 |                | 1.302 |   |
| P27797     | Calreticulin                                                   | CALR     | 50  | 12 | 30   |                | 1.304 |   |
| O75369     | Filamin-B                                                      | FLNB     | 83  | 42 | 21.5 |                | 1.313 |   |
| O43583     | Density-regulated protein                                      | DENR     | 3   | 2  | 17.2 |                | 1.313 |   |
| O43768     | Alpha-endosulfine                                              | ENSA     | 3   | 2  | 16.5 |                | 1.314 |   |
| P41091     | Eukaryotic translation initiation factor 2 subunit 3           | EIF2S3   | 4   | 2  | 7    |                | 1.314 |   |
| P12277     | Creatine kinase B-type                                         | CKB      | 6   | 2  | 8.1  |                | 1.322 |   |
| G3V4W0     | Heterogeneous nuclear ribonucleoproteins C1/C2                 | HNRNPC   | 6   | 4  | 16.8 |                | 1.324 |   |
| P02795     | Metallothionein-2                                              | MT2A     | 29  | 5  | 67.2 |                | 1.326 |   |
| P15291     | Beta-1,4-galactosyltransferase 1                               | B4GALT1  | 2   | 2  | 5.3  | Only 1st batch | 1.333 |   |
| Q01082     | Spectrin beta chain, non-erythrocytic 1                        | SPTBN1   | 4   | 4  | 2.5  |                | 1.335 |   |
| O75487     | Glypican-4                                                     | GPC4     | 2   | 2  | 5.2  |                | 1.344 |   |
| Q06481     | Amyloid-like protein 2                                         | APLP2    | 24  | 9  | 12.6 |                | 1.345 |   |
| E9PES6     | High mobility group protein B3                                 | HMGB3    | 3   | 2  | 17.6 |                | 1.347 |   |
| P55060     | Exportin-2                                                     | CSE1L    | 7   | 3  | 4.3  |                | 1.348 |   |
| O00115     | Deoxyribonuclease-2-alpha                                      | DNASE2   | 7   | 3  | 10.3 |                | 1.348 |   |
| B8ZZQ6     | Prothymosin alpha                                              | PTMA     | 21  | 3  | 14   |                | 1.350 |   |
| P00751     | Complement factor B                                            | CFB      | 9   | 5  | 7.3  |                | 1.352 |   |
| P07900     | Heat shock protein HSP 90-alpha                                | HSP90AA1 | 53  | 14 | 17.2 |                | 1.364 |   |
| Q07954     | Prolow-density lipoprotein receptor-related protein 1          | LRP1     | 9   | 8  | 1.7  |                | 1.373 |   |
| Q12805     | EGF-containing fibulin-like extracellular matrix protein 1     | EFEMP1   | 45  | 14 | 34.3 |                | 1.374 |   |
| O94907     | Dickkopf-related protein 1                                     | DKK1     | 26  | 8  | 34.6 |                | 1.380 |   |
| K7EKH5     | Fructose-bisphosphate aldolase                                 | ALDOC    | 13  | 2  | 19.3 |                | 1.382 |   |
| O43405     | Cochlin                                                        | COCH     | 10  | 6  | 11.3 |                | 1.385 |   |
| O76061     | Stanniocalcin-2                                                | STC2     | 13  | 3  | 17.5 |                | 1.387 |   |
| Q96HE7     | ERO1-like protein alpha                                        | ERO1L    | 3   | 3  | 9.2  |                | 1.390 |   |
| P80723     | Brain acid soluble protein 1                                   | BASP1    | 54  | 11 | 75.3 |                | 1.394 |   |
| P09960     | Leukotriene A-4 hydrolase                                      | LTA4H    | 11  | 6  | 10.3 |                | 1.397 |   |
| Q10471     | Polypeptide N-acetylgalactosaminyltransferase 2                | GALNT2   | 5   | 4  | 6.5  |                | 1.398 |   |
| P51858     | Hepatoma-derived growth factor                                 | HDGF     | 18  | 12 | 55.4 |                | 1.398 |   |
| O43505     | N-acetyllactosaminide beta-1,3-N-acetylglucosaminyltransferase | B3GNT1   | 4   | 3  | 8.2  |                | 1.404 |   |
| Q9H773     | dCTP pyrophosphatase 1                                         | DCTPP1   | 5   | 4  | 22.9 |                | 1.411 | + |
| P61978     | Heterogeneous nuclear ribonucleoprotein K                      | HNRNPK   | 4   | 4  | 10.4 |                | 1.412 |   |
| Q92820     | Gamma-glutamyl hydrolase                                       | GGH      | 28  | 8  | 26.1 |                | 1.415 |   |
| S4R3V8     | Lipolysis-stimulated lipoprotein receptor                      | LSR      | 4   | 3  | 4.3  |                | 1.418 |   |
| Q8NBJ4     | Golgi membrane protein 1                                       | GOLM1    | 45  | 15 | 38.2 |                | 1.420 |   |
| P78371     | T-complex protein 1 subunit beta                               | CCT2     | 4   | 3  | 7.3  |                | 1.432 |   |
| P16035     | Metalloproteinase inhibitor 2                                  | TIMP2    | 17  | 6  | 19.5 |                | 1.438 |   |
| P15514     | Amphiregulin                                                   | AREG     | 12  | 5  | 16.3 |                | 1.451 | + |
| E7ETY2     | Treacle protein                                                | TCOF1    | 14  | 9  | 6.3  |                | 1.459 |   |
| Q5HY54     | Filamin-A                                                      | FLNA     | 130 | 51 | 25.2 |                | 1.460 |   |
| Q14978     | Nucleolar and coiled-body phosphoprotein 1                     | NOLC1    | 4   | 2  | 3.3  |                | 1.462 |   |

|        |                                                            |          |    |    |      |                |       |   |
|--------|------------------------------------------------------------|----------|----|----|------|----------------|-------|---|
| G3V0E5 | Transferrin receptor protein 1                             | TFRC     | 34 | 11 | 19.3 |                | 1.462 |   |
| G3V5D9 | DNA-(apurinic or apyrimidinic site) lyase                  | APEX1    | 9  | 4  | 35.5 |                | 1.464 |   |
| P11047 | Laminin subunit gamma-1                                    | LAMC1    | 36 | 14 | 11.2 |                | 1.471 |   |
| P49321 | Nuclear autoantigenic sperm protein                        | NASP     | 7  | 3  | 4.4  |                | 1.474 |   |
| P19367 | Hexokinase-1                                               | HK1      | 3  | 2  | 2.4  |                | 1.474 |   |
| J3KQ45 | Trans-Golgi network integral membrane protein 2            | TGOLN2   | 6  | 4  | 12.1 |                | 1.491 |   |
| P18669 | Phosphoglycerate mutase 1                                  | PGAM1    | 31 | 10 | 41.7 |                | 1.508 |   |
| P31948 | Stress-induced-phosphoprotein 1                            | STIP1    | 4  | 4  | 8.3  | Only 1st batch | 1.513 |   |
| Q13185 | Chromobox protein homolog 3                                | CBX3     | 4  | 3  | 13.7 | Only 2nd batch | 1.513 |   |
| P07942 | Laminin subunit beta-1                                     | LAMB1    | 6  | 4  | 4    |                | 1.515 |   |
| I6L8B7 | Fatty acid-binding protein, epidermal                      | FABP5    | 26 | 6  | 54.5 |                | 1.520 |   |
| Q9C0C4 | Semaphorin-4C                                              | SEMA4C   | 2  | 2  | 3    | Only 2nd batch | 1.528 |   |
| C9JBB3 | Tissue factor pathway inhibitor                            | TFPI     | 3  | 2  | 11.1 |                | 1.531 | + |
| G3V511 | Latent-transforming growth factor beta-binding protein 2   | LTBP2    | 12 | 8  | 5.8  |                | 1.532 |   |
| P10586 | Receptor-type tyrosine-protein phosphatase F               | PTPRF    | 11 | 7  | 6.6  |                | 1.537 |   |
| A2A2D0 | Stathmin                                                   | STMN1    | 3  | 3  | 37.6 |                | 1.538 | + |
| O00391 | Sulfhydryl oxidase 1                                       | QSOX1    | 44 | 16 | 28.6 |                | 1.541 |   |
| Q24JP5 | Transmembrane protein 132A                                 | TMEM132A | 11 | 8  | 11.7 |                | 1.545 | + |
| O00469 | Procollagen-lysine,2-oxoglutarate 5-dioxygenase 2          | PLOD2    | 30 | 10 | 16.7 |                | 1.545 |   |
| O75882 | Attractin                                                  | ATRN     | 12 | 8  | 6.4  |                | 1.545 |   |
| Q00839 | Heterogeneous nuclear ribonucleoprotein U                  | HNRNPU   | 2  | 2  | 2.1  |                | 1.555 |   |
| Q5TG12 | Receptor-type tyrosine-protein phosphatase kappa           | PTPRK    | 3  | 3  | 3.1  | Only 2nd batch | 1.556 |   |
| P54802 | Alpha-N-acetylglucosaminidase                              | NAGLU    | 5  | 4  | 8.6  |                | 1.559 |   |
| Q14118 | Dystroglycan                                               | DAG1     | 19 | 6  | 10.6 |                | 1.567 |   |
| Q09666 | Neuroblast differentiation-associated protein AHNAK        | AHNAK    | 9  | 4  | 3.9  |                | 1.567 |   |
| P01024 | Complement C3                                              | C3       | 44 | 22 | 14.7 |                | 1.591 |   |
| Q9HBR0 | Putative sodium-coupled neutral amino acid transporter 10  | SLC38A10 | 4  | 2  | 2.3  |                | 1.600 |   |
| P13010 | X-ray repair cross-complementing protein 5                 | XRCC5    | 5  | 2  | 3.7  |                | 1.600 |   |
| P78504 | Protein jagged-1                                           | JAG1     | 8  | 4  | 4.5  |                | 1.600 |   |
| Q86XX4 | Extracellular matrix protein FRAS1                         | FRAS1    | 5  | 3  | 1    |                | 1.604 |   |
| P26641 | Elongation factor 1-gamma                                  | EEF1G    | 6  | 2  | 5.3  | Only 2nd batch | 1.612 |   |
| P49767 | Vascular endothelial growth factor C                       | VEGFC    | 4  | 2  | 4.5  |                | 1.620 |   |
| O00560 | Syntenin-1                                                 | SDCBP    | 6  | 3  | 13.1 |                | 1.623 |   |
| H0Y8E6 | DNA replication licensing factor MCM2                      | MCM2     | 2  | 2  | 2.5  | Only 2nd batch | 1.626 |   |
| P14314 | Glucosidase 2 subunit beta                                 | PRKCSH   | 14 | 5  | 13.6 |                | 1.635 |   |
| P15104 | Glutamine synthetase                                       | GLUL     | 3  | 2  | 4.3  |                | 1.636 |   |
| P53634 | Dipeptidyl peptidase 1                                     | CTSC     | 19 | 5  | 10.6 |                | 1.650 |   |
| H0YMD0 | Annexin                                                    | ANXA2    | 33 | 9  | 39.2 |                | 1.654 |   |
| K7ES54 | Follistatin-related protein 3                              | FSTL3    | 5  | 4  | 27.4 |                | 1.655 | + |
| Q13162 | Peroxiredoxin-4                                            | PRDX4    | 10 | 4  | 21.4 |                | 1.655 |   |
| P55327 | Tumor protein D52                                          | TPD52    | 4  | 3  | 10.7 |                | 1.659 |   |
| P50454 | Serpin H1                                                  | SERPINH1 | 4  | 3  | 7.9  |                | 1.667 |   |
| P13284 | Gamma-interferon-inducible lysosomal thiol reductase       | IFI30    | 5  | 3  | 13.2 |                | 1.675 |   |
| P14625 | Endoplasmic                                                | HSP90B1  | 21 | 10 | 12.2 |                | 1.676 |   |
| P22692 | Insulin-like growth factor-binding protein 4               | IGFBP4   | 47 | 9  | 38.8 |                | 1.678 |   |
| P26583 | High mobility group protein B2                             | HMGB2    | 6  | 4  | 22.5 |                | 1.681 |   |
| P01130 | Low-density lipoprotein receptor                           | LDLR     | 10 | 7  | 9.5  |                | 1.686 |   |
| E9PN89 |                                                            | HSPA8    | 5  | 2  | 3.5  |                | 1.699 |   |
| O43278 | Kunitz-type protease inhibitor 1                           | SPINT1   | 11 | 6  | 13   |                | 1.707 |   |
| P47813 | Eukaryotic translation initiation factor 1A, X-chromosomal | EIF1AX   | 5  | 3  | 22.9 |                | 1.711 | + |

|            |                                                          |          |    |    |      |                |       |   |
|------------|----------------------------------------------------------|----------|----|----|------|----------------|-------|---|
| Q03405     | Urokinase plasminogen activator surface receptor         | PLAUR    | 4  | 4  | 17   |                | 1.720 |   |
| P07996     | Thrombospondin-1                                         | THBS1    | 77 | 26 | 29.1 |                | 1.737 |   |
| F5GZS6     | 4F2 cell-surface antigen heavy chain                     | SLC3A2   | 2  | 2  | 3.8  |                | 1.751 |   |
| P06748     | Nucleophosmin                                            | NPM1     | 12 | 4  | 13.6 |                | 1.755 | + |
| P31947     | 14-3-3 protein sigma                                     | SFN      | 7  | 3  | 19.8 |                | 1.769 |   |
| H0Y875     | Calumenin                                                | CALU     | 8  | 2  | 15.6 |                | 1.773 |   |
| P49327     | Fatty acid synthase                                      | FASN     | 5  | 3  | 1.3  |                | 1.779 |   |
| F5GYN4     | Ubiquitin thioesterase OTUB1                             | OTUB1    | 5  | 3  | 17   |                | 1.791 |   |
| P23246     | Splicing factor, proline- and glutamine-rich             | SFPQ     | 5  | 4  | 9.5  |                | 1.798 |   |
| P15529     | Membrane cofactor protein                                | CD46     | 8  | 2  | 6.1  |                | 1.806 |   |
| E9PQB5     | Lysosomal Pro-X carboxypeptidase                         | PRCP     | 4  | 2  | 13.8 |                | 1.850 |   |
| P14543     | Nidogen-1                                                | NID1     | 4  | 3  | 4.2  |                | 1.851 |   |
| Q9UNW1     | Multiple inositol polyphosphate phosphatase 1            | MINPP1   | 4  | 3  | 7.4  |                | 1.857 |   |
| Q13332     | Receptor-type tyrosine-protein phosphatase S             | PTPRS    | 4  | 4  | 2.8  |                | 1.862 |   |
| Q96C19     | EF-hand domain-containing protein D2                     | EFHD2    | 5  | 4  | 19.6 |                | 1.867 | + |
| C9JFE4     | COP9 signalosome complex subunit 1                       | GPS1     | 3  | 2  | 6.4  |                | 1.890 |   |
| A0A087WXM8 | Basal cell adhesion molecule                             | BCAM     | 2  | 2  | 3.6  |                | 1.906 |   |
| Q02952     | A-kinase anchor protein 12                               | AKAP12   | 6  | 5  | 5.2  |                | 1.961 |   |
| P11216     | Glycogen phosphorylase, brain form                       | PYGB     | 2  | 2  | 2.8  |                | 1.989 |   |
| P24592     | Insulin-like growth factor-binding protein 6             | IGFBP6   | 33 | 5  | 26.2 |                | 1.995 |   |
| P08476     | Inhibin beta A chain                                     | INHBA    | 42 | 12 | 30.8 |                | 1.997 |   |
| A0A0C4DGH5 | Cullin-associated NEDD8-dissociated protein 1            | CAND1    | 2  | 2  | 3    | Only 2nd batch | 2.008 |   |
| P17931     | Galectin-3                                               | LGALS3   | 5  | 3  | 14.4 |                | 2.022 |   |
| F8WEX7     | Cholinesterase                                           | BCHE     | 2  | 2  | 4    |                | 2.062 |   |
| F5H6X6     | Neutral alpha-glucosidase AB                             | GANAB    | 34 | 11 | 17.5 |                | 2.063 |   |
| Q9UNZ2     | NSFL1 cofactor p47                                       | NSFL1C   | 10 | 7  | 25.1 |                | 2.066 |   |
| Q969H8     | UPF0556 protein C19orf10                                 | C19orf10 | 23 | 3  | 22   |                | 2.069 |   |
| P12429     | Annexin A3                                               | ANXA3    | 10 | 7  | 27.2 |                | 2.076 |   |
| P29279     | Connective tissue growth factor                          | CTGF     | 2  | 2  | 6    | Only 2nd batch | 2.090 |   |
| B8ZZU8     | Transcription elongation factor B polypeptide 2          | TCEB2    | 3  | 2  | 10.6 |                | 2.116 | + |
| Q9BYC5     | Alpha-(1,6)-fucosyltransferase                           | FUT8     | 4  | 2  | 4    |                | 2.134 | + |
| K7EN15     | Soluble calcium-activated nucleotidase 1                 | CANT1    | 5  | 3  | 8.7  |                | 2.149 | + |
| A0A087WZH7 | Myristoylated alanine-rich C-kinase substrate            | MARCKS   | 7  | 6  | 33.9 |                | 2.252 | + |
| P04062     | Glucosylceramidase                                       | GBA      | 8  | 6  | 11.6 |                | 2.261 |   |
| Q92945     | Far upstream element-binding protein 2                   | KHSRP    | 5  | 2  | 6.8  |                | 2.272 |   |
| P19022     | Cadherin-2                                               | CDH2     | 12 | 3  | 6.3  |                | 2.396 |   |
| P42830     | C-X-C motif chemokine 5                                  | CXCL5    | 8  | 4  | 36.8 |                | 2.396 |   |
| Q5H9A7     | Metalloproteinase inhibitor 1                            | TIMP1    | 44 | 6  | 54.5 |                | 2.428 |   |
| P30447     | HLA class I histocompatibility antigen, A-23 alpha chain | HLA-A    | 13 | 6  | 21.6 |                | 2.436 | + |
| D3DQB3     | Testican-1                                               | SPOCK1   | 3  | 2  | 9.5  |                | 2.477 | + |
| Q8NC51     | Plasminogen activator inhibitor 1 RNA-binding protein    | SERBP1   | 9  | 5  | 16.9 |                | 2.538 |   |
| P17174     | Aspartate aminotransferase, cytoplasmic                  | GOT1     | 10 | 7  | 18.6 |                | 2.571 |   |
| C9J5B0     | Interleukin-6                                            | IL6      | 10 | 4  | 29.6 |                | 2.645 |   |
| O75635     | Serpin B7                                                | SERPINB7 | 6  | 4  | 10.5 |                | 2.648 | + |
| P46108     | Adapter molecule crk                                     | CRK      | 2  | 2  | 6.9  | Only 2nd batch | 2.748 | + |
| P43121     | Cell surface glycoprotein MUC18                          | MCAM     | 4  | 2  | 3.9  |                | 2.975 |   |
| G3V2V8     | Epididymal secretory protein E1                          | NPC2     | 34 | 6  | 54.9 |                | 3.056 |   |
| K7EL68     | Hsp90 co-chaperone Cdc37                                 | CDC37    | 6  | 3  | 17.9 |                | 3.107 | + |
| Q13200     | 26S proteasome non-ATPase regulatory subunit 2           | PSMD2    | 3  | 2  | 4.2  |                | 3.111 |   |
| B1AKC9     | Ephrin type-B receptor 2                                 | EPHB2    | 5  | 4  | 5.9  |                | 3.192 |   |

|        |                                                                |          |    |   |      |                |       |   |
|--------|----------------------------------------------------------------|----------|----|---|------|----------------|-------|---|
| Q15459 | Splicing factor 3A subunit 1                                   | SF3A1    | 3  | 2 | 3.3  | Only 2nd batch | 3.195 |   |
| P05198 | Eukaryotic translation initiation factor 2 subunit 1           | EIF2S1   | 4  | 2 | 8.6  |                | 3.341 |   |
| Q99674 | Cell growth regulator with EF hand domain protein 1            | CGREF1   | 7  | 5 | 22.6 |                | 3.364 |   |
| Q8NBP7 | Proprotein convertase subtilisin/kexin type 9                  | PCSK9    | 4  | 2 | 3.3  |                | 3.376 |   |
| Q92876 | Kallikrein-6                                                   | KLK6     | 2  | 2 | 16.4 | Only 2nd batch | 3.521 |   |
| Q8WW12 | PEST proteolytic signal-containing nuclear protein             | PCNP     | 2  | 2 | 17.4 |                | 3.642 | + |
| P03973 | Antileukoproteinase                                            | SLPI     | 11 | 3 | 17.4 |                | 3.957 |   |
| O14672 | Disintegrin and metalloproteinase domain-containing protein 10 | ADAM10   | 5  | 3 | 6.1  |                | 4.439 |   |
| Q5K684 | Serpin B3                                                      | SERPINB3 | 9  | 3 | 7.7  |                | 4.533 | + |
| Q9GZL7 | Ribosome biogenesis protein WDR12                              | WDR12    | 3  | 3 | 10.2 |                | 4.738 |   |
| E9PKG2 | Low-density lipoprotein receptor-related protein 8             | LRP8     | 3  | 2 | 5.6  |                | 4.741 | + |
| B7Z5J4 | Carboxypeptidase A4                                            | CPA4     | 2  | 2 | 6    | Only 2nd batch | 4.769 |   |
| P80188 | Neutrophil gelatinase-associated lipocalin                     | LCN2     | 27 | 5 | 36.9 |                | 5.073 |   |
| Q92859 | Neogenin                                                       | NEO1     | 3  | 2 | 2.1  |                | 5.278 |   |
| P19957 | Elafin                                                         | PI3      | 10 | 3 | 25.6 |                | 5.627 |   |
| Q15828 | Cystatin-M                                                     | CST6     | 3  | 2 | 21.5 |                | 8.690 |   |
| P08243 | Asparagine synthetase [glutamine-hydrolyzing]                  | ASNS     | 3  | 2 | 4.3  |                | -     | + |
| Q9Y266 | Nuclear migration protein nudC                                 | NUDC     | 3  | 3 | 10   |                | -     | + |
| Q9NX62 | Inositol monophosphatase 3                                     | IMPAD1   | 2  | 2 | 4.2  | Only 2nd batch | -     | + |
| Q8NFZ8 | Cell adhesion molecule 4                                       | CADM4    | 3  | 2 | 6.4  |                | -     | + |
| O76003 | Glutaredoxin-3                                                 | GLRX3    | 2  | 2 | 6.9  |                | -     | + |
| Q9HAV7 | GrpE protein homolog 1, mitochondrial                          | GRPEL1   | 3  | 2 | 12.4 |                | -     | + |
| Q7LGC8 | Carbohydrate sulfotransferase 3                                | CHST3    | 2  | 2 | 6.5  | Only 2nd batch | -     | + |
| K7EPL2 | SUMO-activating enzyme subunit 2                               | UBA2     | 3  | 2 | 9.2  |                | -     | + |
| E9PLA9 | Caprin-1                                                       | CAPRIN1  | 2  | 2 | 12.4 |                | -     | + |
| Q14703 | Membrane-bound transcription factor site-1 protease            | MBTPS1   | 2  | 2 | 2.9  |                | -     | + |
| Q9P258 | Protein RCC2                                                   | RCC2     | 2  | 2 | 5.9  | Only 2nd batch | -     | + |
| B4DLR8 | NAD(P)H dehydrogenase [quinone] 1                              | NQO1     | 3  | 2 | 11.9 |                | -     | + |
| Q96FJ2 | Dynein light chain 2, cytoplasmic                              | DYNLL2   | 2  | 2 | 20.2 | Only 2nd batch | -     | + |
| A8MXH2 | Nucleosome assembly protein 1-like 4                           | NAP1L4   | 2  | 2 | 13.5 | Only 2nd batch | -     |   |
| Q15393 | Splicing factor 3B subunit 3                                   | SF3B3    | 3  | 3 | 3.7  |                | -     |   |
| Q86SQ4 | G-protein coupled receptor 126                                 | GPR126   | 4  | 2 | 2.4  |                | -     |   |
| X1WI29 | Laminin subunit beta-3                                         | LAMB3    | 2  | 2 | 21.4 | Only 1st batch | -     |   |
| Q8NCW5 | NAD(P)H-hydrate epimerase                                      | APOA1BP  | 2  | 2 | 9    | Only 1st batch | -     |   |
| Q9Y265 | RuvB-like 1                                                    | RUVBL1   | 2  | 2 | 4.2  | Only 1st batch | -     |   |
| F5H7V1 | Nardilysin                                                     | NRD1     | 2  | 2 | 2.5  | Only 2nd batch | -     |   |
| H3BPC4 | SUMO-conjugating enzyme UBC9                                   | UBE2I    | 2  | 2 | 30   | Only 2nd batch | -     |   |
| O15067 | Phosphoribosylformylglycinamide synthase                       | PFAS     | 2  | 2 | 1.3  | Only 2nd batch | -     |   |
| P34096 | Ribonuclease 4                                                 | RNASE4   | 2  | 2 | 16.3 | Only 2nd batch | -     |   |
| Q16610 | Extracellular matrix protein 1                                 | ECM1     | 7  | 5 | 12.6 |                | -     |   |
| F8W6I7 | Heterogeneous nuclear ribonucleoprotein A1                     | HNRNPA1  | 5  | 4 | 12.7 |                | -     |   |
| P36871 | Phosphoglucomutase-1                                           | PGM1     | 4  | 3 | 7.3  |                | -     |   |
| Q9Y230 | RuvB-like 2                                                    | RUVBL2   | 4  | 3 | 7.6  |                | -     |   |
| P52823 | Stanniocalcin-1                                                | STC1     | 3  | 3 | 14.2 |                | -     |   |
| H3BM42 | Golgi apparatus protein 1                                      | GLG1     | 6  | 2 | 3.9  |                | -     |   |
| H0Y586 | Proteasome subunit alpha type-7                                | PSMA7    | 3  | 2 | 12.8 |                | -     |   |
| F8WC54 | Disintegrin and metalloproteinase domain-containing protein 9  | ADAM9    | 3  | 2 | 3.8  |                | -     |   |
| O14980 | Exportin-1                                                     | XPO1     | 3  | 2 | 2    |                | -     |   |
| A6QRJ1 | V-type proton ATPase subunit S1                                | ATP6AP1  | 3  | 2 | 13   |                | -     |   |
| P23381 | Tryptophan--tRNA ligase, cytoplasmic                           | WARS     | 2  | 2 | 5.3  |                | -     |   |

|        |                                                      |        |   |   |     |                |   |  |
|--------|------------------------------------------------------|--------|---|---|-----|----------------|---|--|
| P55884 | Eukaryotic translation initiation factor 3 subunit B | EIF3B  | 2 | 2 | 2.8 |                | - |  |
| Q92973 | Transportin-1                                        | TNPO1  | 2 | 2 | 3.7 |                | - |  |
| E9PMD7 | Serine/threonine-protein phosphatase                 | PPP1CA | 2 | 2 | 7.1 | Only 2nd batch | - |  |
